# Supplementary material for: Occurrence of mental health symptoms and disorders in current and former elite athletes: a systematic review and meta-analysis
Source: PubMed Central journal article supplement — Br J Sports Med. 2019 May 16;53(11):700–6. doi: 10.1136/bjsports-2019-100671 (PMC6579497; doi:10.1136/bjsports-2019-100671), 2019-05-16
Supplement: bjsports-2019-100671supp002.pdf [file bjsports-2019-100671supp002.pdf]

**TABLE 1 Occurrence of (symptoms of) mental health disorders among current elite athletes: data extraction from included studies.**

| Article information               | Study population                                                                                                                                                                                                                                                                 | Study design                  | Outcome measures (caseness cut-off)                                                                                                                                                                                                                                                      | Prevalence/incidence % (95% CI)                                                                                                     |
|-----------------------------------|----------------------------------------------------------------------------------------------------------------------------------------------------------------------------------------------------------------------------------------------------------------------------------|-------------------------------|------------------------------------------------------------------------------------------------------------------------------------------------------------------------------------------------------------------------------------------------------------------------------------------|-------------------------------------------------------------------------------------------------------------------------------------|
| Biggins 2017 <sup>15</sup>        | <b>N=</b> 69<br><b>A=</b> 22.7 yrs (SD=4.1)<br><b>G=</b> M:F 69:0<br><b>Nat=</b> Ireland<br><b>S=</b> Gaelic football and hurling                                                                                                                                                | Observational cross-sectional | <b>Definition:</b> 1-month prevalence of sleep disturbance<br><br><b>Instrument(s):</b><br>- Sleep quality: PSQI (≥5)                                                                                                                                                                    | <b>1-month prevalence;</b><br>- Poor sleep 47.8 (NR)                                                                                |
| Drew 2017 <sup>17</sup>           | <b>N=</b> 132<br><b>A=</b> <b>A=</b> Male: 25.8 yrs (SD=4.1); Female: 24.3 yrs (SD=3.9)<br><b>G=</b> M:F 47:85<br><b>Nat=</b> Australia<br><b>S=</b> Olympic Sports (Boxing, Equestrian, Football, Gymnastics, Hockey, Rowing, Rugby sevens, Sailing, Triathlon, and Water polo) | Observational cross-sectional | <b>Definition:</b> Prevalence of poor sleep quality, and poor mental health symptoms<br><br><b>Instrument(s):</b><br>- Depression: DASS-21 subscale (>4)<br>- Anxiety: DASS-21 subscale (>3)<br>- Stress: DASS-21 subscale (>8)<br>- Sleep quality: PSQI (≥5)<br>- Sleepiness: ESS (>10) | <b>Prevalence;</b><br>- Depression 17 (NR)<br>- Anxiety 19 (NR)<br>- Stress 14 (NR)<br>- Poor sleep 49 (NR)<br>- Sleepiness 22 (NR) |
| Du Preez 2017 <sup>18</sup>       | <b>N=</b> 404<br><b>A=</b> 21.4 yrs (SD=3.6)<br><b>G=</b> M:F 404:0<br><b>Nat=</b> Australia<br><b>S=</b> Rugby                                                                                                                                                                  | Observational cross-sectional | <b>Definition:</b> Prevalence of depression, generalized anxiety, and alcohol misuse<br><br><b>Instrument(s):</b><br>- Depression: PHQ-9 (≥10)<br>- Anxiety/depression: GAD-7 (≥10)<br>- Alcohol Misuse: AUDIT-C (≥4)                                                                    | <b>Prevalence;</b><br>- Depression 17 (NR)<br>- Anxiety 19 (NR)<br>- Alcohol Misuse 68.6 (NR)                                       |
| Escobar-Molina 2014 <sup>19</sup> | <b>N=</b> 68<br><b>A=</b> 21.4 yrs (SD=3.0)<br><b>G=</b> M:F 37:31<br><b>Nat=</b> Spain<br><b>S=</b> Judo                                                                                                                                                                        | Observational cross-sectional | <b>Definition:</b> Mean scores of anxiety and eating attitudes<br><br><b>Instrument(s):</b><br>- Anxiety: STAI-T (NR)<br>- Eating attitudes: EAT-40 (NR)                                                                                                                                 | <b>Mean Scores;</b><br>- Anxiety 17.7 (SD=6.9)<br>- Eating attitudes 12.2 (SD=9.1)                                                  |
| Foskett 2018 <sup>20</sup>        | <b>N=</b> 143<br><b>A=</b> 24 yrs (SD=8.6)<br><b>G=</b> M:F 81:61*<br><b>Nat=</b> UK<br><b>S=</b> 25 different sports                                                                                                                                                            | Observational cross-sectional | <b>Definition:</b> Prevalence of signs of distress and anxiety/depression<br><br><b>Instrument(s):</b><br>- Distress :4DSQ (≥4)<br>- Anxiety/depression: GHQ-12 (≥2)                                                                                                                     | <b>Prevalence;</b><br>- Distress 26.8 (NR)<br>- Anxiety/depression 47.8 (NR)                                                        |
| Giel 2016 <sup>21</sup>           | <b>N=</b> 1138<br><b>A=</b> 16.3 yrs (SD=1.1)                                                                                                                                                                                                                                    | Observational cross-sectional | <b>Definition:</b> Prevalence of depression/anxiety, and eating disorder pathology                                                                                                                                                                                                       | <b>Prevalence (among individuals non-weight dependent sports);</b>                                                                  |

|                                |                                                                                                                                                                                                                 |                                  |                                                                                                                                                                                                                                                                                                                                                                                                    |                                                                                                                                                                                                                                                                                                                                                                              |
|--------------------------------|-----------------------------------------------------------------------------------------------------------------------------------------------------------------------------------------------------------------|----------------------------------|----------------------------------------------------------------------------------------------------------------------------------------------------------------------------------------------------------------------------------------------------------------------------------------------------------------------------------------------------------------------------------------------------|------------------------------------------------------------------------------------------------------------------------------------------------------------------------------------------------------------------------------------------------------------------------------------------------------------------------------------------------------------------------------|
|                                | <b>G</b> =M:F 638:500*<br><b>Nat</b> = Germany<br><b>S</b> = 51 Olympic sports                                                                                                                                  |                                  | <b>Instrument(s):</b><br>- Depression/Anxiety: PHQ-4 (>5)<br>- Eating Disorders: FKKS (<19), SIAB-S (>1 compensatory behavior), and SCOFF (>1 positive answer)                                                                                                                                                                                                                                     | - Eating Disorder Pathology 27.9 (NR)<br>- Anxiety/depression 6.9 (NR)                                                                                                                                                                                                                                                                                                       |
| Goutteborge 2015 <sup>12</sup> | <b>N</b> = 607<br><b>A</b> = 26.8 yrs (SD=4.4)<br><b>G</b> =M:F 607:0<br><b>Nat</b> = Belgium, Chile, Finland, France, Japan, Norway, Paraguay, Peru, Spain, Sweden, Switzerland<br><b>S</b> =Football (soccer) | Observational cross-sectional    | <b>Definition:</b> 4-week prevalence of symptoms of distress, anxiety/depression, smoking, and adverse alcohol use.<br><br><b>Instrument(s):</b><br>- Distress: 4DSQ (≥4)<br>- Anxiety/depression: GHQ-12 (≥3)<br>- Adverse alcohol use: AUDIT-C (≥5)                                                                                                                                              | <b>4-week prevalence;</b><br>- Distress 14.8 (11.8-17.8)<br>- Anxiety/depression 37.9 (33.7-42.2)<br>- Sleep disturbance 23.4 (19.8-26.9)<br>- Adverse alcohol use 9.4 (7.0-11.9)                                                                                                                                                                                            |
| Goutteborge 2015 <sup>22</sup> | <b>N</b> = 149<br><b>A</b> = 27 yrs (SD=5)<br><b>G</b> =M:F 607:0<br><b>Nat</b> = Australia, Ireland, The Netherlands, New Zealand, Scotland and USA<br><b>S</b> =Football (soccer)                             | Observational cross-sectional    | <b>Definition:</b> 6-month prevalence of symptoms of distress, burnout, 1-month prevalence of anxiety/depression, and point prevalence of smoking, and adverse alcohol use.<br><br><b>Instrument(s):</b><br>- Distress :4DSQ (≥4)<br>- Anxiety/depression: GHQ-12 (≥3)<br>- Burnout: Utrecht Burn-Out Scale (>75% percentile from the reference population)<br>- Adverse alcohol use: AUDIT-C (≥5) | <b>1-month prevalence;</b><br>- Distress 10 (6-16)<br>- Anxiety/depression 26 (19-33)<br><br><b>6-month prevalence;</b><br>- Burnout 5 (2-10)<br>- Low self-esteem 3 (1-8)<br><br><b>Point prevalence;</b><br>- Smoking 7 (4-12)<br>- Adverse alcohol use 19 (13-26)                                                                                                         |
| Goutteborge 2016 <sup>24</sup> | <b>N</b> =204 (baseline), 108 (6-month follow-up)<br><b>A</b> =25 yrs (SD=4)<br><b>G</b> =M:F 204:0<br><b>Nat</b> = Ireland<br><b>S</b> = Gaelic sports (hurling/football)                                      | Observational prospective cohort | <b>Definition:</b> 4-week prevalence, and 6-month incidence of symptoms of distress, anxiety/depression, sleep disturbance, and adverse alcohol use.<br><br><b>Instrument(s):</b><br>- Distress :4DSQ (≥4)<br>- Anxiety/depression: GHQ-12 (≥3)<br>- Sleep disturbance: PROMIS Sleep (≥13)<br>- Adverse alcohol use: AUDIT-C (≥5)                                                                  | <b>4-week prevalence;</b><br>- Distress 38.3 (31.4–45.3)<br>- Anxiety/depression 47.8 (40.6–55.1)<br>- Sleep disturbance 33.0 (26.3–39.7)<br>- Adverse alcohol use 23.2 (17.0–29.4)<br><br><b>6-month incidence;</b><br>- Distress 14.1 (7.6–24.2)<br>- Anxiety/depression 20.7 (12.1–33.4)<br>- Sleep disturbance 11.1 (5.5–20.7)<br>- Adverse alcohol use 17.5 (10.6–27.4) |
| Goutteborge 2017 <sup>13</sup> | <b>N</b> =203 (baseline), 143 (12-month follow-up)<br><b>A</b> = 27 yrs (SD=7)                                                                                                                                  | Observational prospective cohort | <b>Definition:</b> 12-month incidence of symptoms of distress, anxiety/depression, sleep disturbance, and adverse alcohol use.                                                                                                                                                                                                                                                                     | <b>12-month incidence;</b><br>- Distress 32.4 (19.6–48.6)<br>- Anxiety/depression 56.8 (40.9–71.3)                                                                                                                                                                                                                                                                           |

|                                |                                                                                                                                                                                                                          |                                  |                                                                                                                                                                                                                                                                                                                                                                                                                                             |                                                                                                                                                                                                                                                                                                                                                                                                                                                     |
|--------------------------------|--------------------------------------------------------------------------------------------------------------------------------------------------------------------------------------------------------------------------|----------------------------------|---------------------------------------------------------------------------------------------------------------------------------------------------------------------------------------------------------------------------------------------------------------------------------------------------------------------------------------------------------------------------------------------------------------------------------------------|-----------------------------------------------------------------------------------------------------------------------------------------------------------------------------------------------------------------------------------------------------------------------------------------------------------------------------------------------------------------------------------------------------------------------------------------------------|
|                                | <b>G</b> =M:F 73:130<br><b>Nat</b> = Netherlands<br><b>S</b> = Mixed Olympic and national team athletes                                                                                                                  |                                  | <b>Instrument(s):</b><br>- Distress :4DSQ ( $\geq 4$ )<br>- Anxiety/depression: GHQ-12 ( $\geq 3$ )<br>- Sleep disturbance: PROMIS Sleep ( $\geq 13$ )<br>- Adverse alcohol use: AUDIT-C ( $\geq 5$ )                                                                                                                                                                                                                                       | - Sleep disturbance 19.4 (9.5–35.3)<br>- Adverse alcohol use 5.6 (0.6–19.1)<br>- Eating disorders 16.7 (7.5–32.3)                                                                                                                                                                                                                                                                                                                                   |
| Goutteborge 2017 <sup>28</sup> | <b>N</b> =384 (baseline), 262 (12-month follow-up)<br><b>A</b> =27 yrs (SD=NR)<br><b>G</b> =M:F 384:0<br><b>Nat</b> = Finland, France, Norway, Spain, Sweden<br><b>S</b> =Football (soccer)                              | Observational prospective cohort | <b>Definition:</b> 12-month incidence of symptoms of distress, anxiety/depression, sleep disturbance, and adverse alcohol use.<br><br><b>Instrument(s):</b><br>- Distress :4DSQ ( $\geq 4$ )<br>- Anxiety/depression: GHQ-12 ( $\geq 3$ )<br>- Sleep disturbance: PROMIS Sleep ( $\geq 13$ )<br>- Adverse alcohol use: AUDIT-C ( $\geq 5$ )                                                                                                 | <b>12-month incidence;</b><br>- Distress 11.9 (7.3-18.5)<br>- Anxiety/depression 37.0 (29.4-45.4)<br>- Sleep 18.5 (12.8-26.0)<br>- Adverse alcohol use 14.1 (9.1-21.0)                                                                                                                                                                                                                                                                              |
| Goutteborge 2017 <sup>31</sup> | <b>N</b> =135 (baseline), 81 (6-month follow-up)<br><b>A</b> =26 yrs (SD=5)<br><b>G</b> =M:F 135:0<br><b>Nat</b> =Denmark, Finland, Norway, Switzerland<br><b>S</b> =Ice hockey                                          | Observational prospective cohort | <b>Definition:</b> 4-week prevalence, and 6-month incidence of symptoms of distress, anxiety/depression, sleep disturbance, and adverse alcohol use.<br><br><b>Instrument(s):</b><br>- Distress :4DSQ ( $\geq 4$ )<br>- Anxiety/depression: GHQ-12 ( $\geq 3$ )<br>- Sleep disturbance: PROMIS Sleep ( $\geq 13$ )<br>- Adverse alcohol use: AUDIT-C ( $\geq 5$ )<br>- Eating disorders: Eating Disorder Screen - Primary Care ( $\geq 2$ ) | <b>4-week prevalence;</b><br>- Distress 13.4 (8.6–20.3)<br>- Anxiety/depression 24.1 (17.6–32.0)<br>- Sleep disturbance 15.0 (9.9–22.2)<br>- Adverse alcohol use 7.6 (4.0–13.5)<br>- Eating disorders 17.6 (10.2–28.5)<br><br><b>6-month incidence;</b><br>- Distress 5.6 (<0.1–27.7)<br>- Anxiety/depression 16.7 (5.0–40.1)<br>- Sleep disturbance 11.1 (1.9–34.1)<br>- Adverse alcohol use 5.6 (<0.1–27.7)<br>- Eating disorders 22.2 (8.5–45.8) |
| Goutteborge 2017 <sup>29</sup> | <b>N</b> =990<br><b>A</b> =25 yrs (SD=4)<br><b>G</b> =M:F 941:49<br><b>Nat</b> =Argentina, Australia, Canada, England, France, Ireland, Italy, New Zealand, Pacific Islands, South Africa, USA, Wales<br><b>S</b> =Rugby | Observational cross-sectional    | <b>Definition:</b> 4-week prevalence of symptoms of distress, anxiety/depression, sleep disturbance, eating disorders, and adverse alcohol use.<br><br><b>Instrument(s):</b><br>- Distress :4DSQ ( $\geq 4$ )<br>- Anxiety/depression: GHQ-12 ( $\geq 3$ )<br>- Sleep disturbance: PROMIS Sleep ( $\geq 13$ )<br>- Adverse alcohol use: AUDIT-C ( $\geq 5$ )<br>- Eating disorders: Eating Disorder Screen - Primary Care ( $\geq 2$ )      | <b>4-week prevalence;</b><br>- Distress 17 (15–20)<br>- Anxiety/depression 30 (27–33)<br>- Sleep disturbance 13 (11–15)<br>- Adverse alcohol use 15 (13–18)<br>- Eating disorders 23 (20–26)                                                                                                                                                                                                                                                        |
| Goutteborge 2018 <sup>32</sup> | <b>N</b> =595 (baseline), 333 (12-month follow-up)<br><b>A</b> =26 yrs (SD=4)<br><b>G</b> =M:F 595:0                                                                                                                     | Observational prospective cohort | <b>Definition:</b> 12-month incidence of symptoms of distress, anxiety/depression, sleep disturbance, and adverse alcohol use.                                                                                                                                                                                                                                                                                                              | <b>12-month incidence;</b><br>- Distress 11 (6–16)<br>- Anxiety/depression 28 (21–35)<br>- Sleep disturbance 12 (7–17)                                                                                                                                                                                                                                                                                                                              |

|                              |                                                                                                                                                                                                                                                                                                                                                                                                                                                          |                               |                                                                                                                                                                                                                                                                                                                                                                                                                                                                                                           |                                                                                                                                                                                                                                                                              |
|------------------------------|----------------------------------------------------------------------------------------------------------------------------------------------------------------------------------------------------------------------------------------------------------------------------------------------------------------------------------------------------------------------------------------------------------------------------------------------------------|-------------------------------|-----------------------------------------------------------------------------------------------------------------------------------------------------------------------------------------------------------------------------------------------------------------------------------------------------------------------------------------------------------------------------------------------------------------------------------------------------------------------------------------------------------|------------------------------------------------------------------------------------------------------------------------------------------------------------------------------------------------------------------------------------------------------------------------------|
|                              | <p><b>Nat</b>= Argentina, Australia, Canada, England, France, Ireland, Italy, New Zealand, Pacific Islands (including Fiji, Samoa, Tonga), South Africa, USA, Wales</p> <p><b>S</b>=Rugby</p>                                                                                                                                                                                                                                                            |                               | <p><b>Instrument(s):</b></p> <ul style="list-style-type: none"> <li>- Distress :4DSQ (<math>\geq 4</math>)</li> <li>- Anxiety/depression: GHQ-12 (<math>\geq 3</math>)</li> <li>- Sleep disturbance: PROMIS Sleep (<math>\geq 13</math>)</li> <li>- Adverse alcohol use: AUDIT-C (<math>\geq 5</math>)</li> </ul>                                                                                                                                                                                         | <ul style="list-style-type: none"> <li>- Adverse alcohol use 22 (15–29)</li> <li>- Eating disorders 11 (6–16)</li> </ul>                                                                                                                                                     |
| Gulliver 2015 <sup>33</sup>  | <p><b>N</b>=224</p> <p><b>A</b>= 24.9 yrs (SD=6.0)</p> <p><b>G</b>=M:F 106:118</p> <p><b>Nat</b>= Australia</p> <p><b>S</b>=Cricket, football (soccer), hockey, netball, rowing, sailing, water polo, softball, athletics/track and field, cycling (track and road), skiing (alpine and aerial), volleyball, golf, powerlifting, archery, beach volleyball, canoe slalom, gymnastics, swimming, triathlon, basketball, kayak, orienteering, skeleton</p> | Observational cross-sectional | <p><b>Definition:</b> Prevalence of general psychological distress and common mental disorders.</p> <p><b>Instrument(s):</b></p> <ul style="list-style-type: none"> <li>- Distress: K-10 (<math>\geq 22</math>)</li> <li>- Anxiety: GAD-7 (<math>\geq 11</math>)</li> <li>- Depression: CES-D (<math>\geq 16</math>)</li> <li>- Social anxiety: SPIN (<math>\geq 19</math>)</li> <li>- Panic disorder: PDSS-SR (<math>\geq 19</math>)</li> <li>- Eating disorders: SCOFF (<math>\geq 2</math>)</li> </ul> | <p><b>Prevalence;</b></p> <ul style="list-style-type: none"> <li>- Distress:16.5 (NR)</li> <li>- Anxiety: 7.1 (NR)</li> <li>- Depression:27.2 (NR)</li> <li>- Social anxiety:14.7 (NR)</li> <li>- Panic disorder: 4.5 (NR)</li> <li>- Eating disorders: 22.8 (NR)</li> </ul> |
| Hakansson 2018 <sup>34</sup> | <p><b>N</b>= 352</p> <p><b>A</b>= 23.7 (SD = 3.2)</p> <p><b>G</b>= M:F 141:211</p> <p><b>Nat</b>= Sweden</p> <p><b>S</b>= Several (most common: athletics; martial arts; cross-country skiing; handball; canoeing; alpine skiing; gymnastics)</p>                                                                                                                                                                                                        | Observational cross-sectional | <p><b>Definition:</b> Prevalence of problem gambling, problem gaming, and hazardous drinking</p> <p><b>Instrument(s):</b></p> <ul style="list-style-type: none"> <li>- Problem gambling: NODS-CLiP (<math>\geq 1</math>)</li> <li>- Problem gaming: GASA (<math>\geq 4</math>)</li> <li>- Adverse alcohol use: AUDIT-C (<math>\geq 5</math> male; <math>\geq 4</math> female)</li> </ul>                                                                                                                  | <p><b>Prevalence;</b></p> <ul style="list-style-type: none"> <li>- Problem gambling: 7 (NR)</li> <li>- Problem gaming: 2 (NR)</li> <li>- Hazardous drinking: 26 (NR)</li> </ul>                                                                                              |
| Hulley 2001 <sup>36</sup>    | <p><b>N</b>=184</p> <p><b>A</b>=28.5 (SD=0.5)</p> <p><b>G</b>=M:F 0:184</p> <p><b>Nat</b>=England, Scotland, Wales</p> <p><b>S</b>=Distance running</p>                                                                                                                                                                                                                                                                                                  | Observational cross-sectional | <p><b>Definition:</b> Prevalence of eating disorder.</p> <p><b>Instrument(s):</b></p> <p>Diagnostic instrument not specified.</p>                                                                                                                                                                                                                                                                                                                                                                         | <p><b>Prevalence;</b></p> <ul style="list-style-type: none"> <li>- Anorexia nervosa n=7, 3.8 (NR)</li> <li>- Bulimia nervosa n=2, 1.1 (NR)</li> <li>- EDNOS n=20, 10.9 (NR)</li> </ul>                                                                                       |
| Junge 2016 <sup>37</sup>     | <p><b>N</b>=471</p> <p><b>A</b>=22.3 yrs (SD=4.47)</p> <p><b>G</b>=M:F 289:182</p> <p><b>Nat</b>=Switzerland</p> <p><b>S</b>=Football (soccer)</p>                                                                                                                                                                                                                                                                                                       | Observational cross-sectional | <p><b>Definition:</b> Prevalence of depression and anxiety.</p> <p><b>Instrument(s):</b></p> <ul style="list-style-type: none"> <li>- Depression: CES-D (<math>\geq 16</math>, 21)</li> <li>- Anxiety: GAD-7 (<math>\geq 10</math>)</li> </ul>                                                                                                                                                                                                                                                            | <p><b>Prevalence;</b></p> <ul style="list-style-type: none"> <li>- Depression, mild-moderate n=33, 7.6 (NR)</li> <li>- Depression, major n=13, 3.0 (NR)</li> <li>- Anxiety, moderate n=6, 1.4 (NR)</li> </ul>                                                                |

|                             |                                                                                                                                                                                                                                        |                                                 |                                                                                                                                                                                                                                                                                                                                                                                                                                                        |                                                                                                                                                                                                                                                                                                                                                                                                                                                                                                                                                                                                                                                                                                                                                                                                                                                                                                                                                                                                                                       |
|-----------------------------|----------------------------------------------------------------------------------------------------------------------------------------------------------------------------------------------------------------------------------------|-------------------------------------------------|--------------------------------------------------------------------------------------------------------------------------------------------------------------------------------------------------------------------------------------------------------------------------------------------------------------------------------------------------------------------------------------------------------------------------------------------------------|---------------------------------------------------------------------------------------------------------------------------------------------------------------------------------------------------------------------------------------------------------------------------------------------------------------------------------------------------------------------------------------------------------------------------------------------------------------------------------------------------------------------------------------------------------------------------------------------------------------------------------------------------------------------------------------------------------------------------------------------------------------------------------------------------------------------------------------------------------------------------------------------------------------------------------------------------------------------------------------------------------------------------------------|
| Kilic 2017 <sup>39</sup>    | <p><b>N</b>=348 football, 232 handball<br/> <b>A</b>=25.8 yrs (SD=4.9) football, 25.3 yrs (SD=4.5) handball<br/> <b>G</b>=M:F 285:63 football, 118: 114 handball<br/> <b>Nat</b>=Denmark<br/> <b>S</b>=Football (soccer), handball</p> | Observational cross-sectional                   | <p><b>Definition:</b> 4-week prevalence of symptoms of distress, anxiety/depression, sleep disturbance, and adverse alcohol use.</p> <p><b>Instrument(s):</b></p> <ul style="list-style-type: none"> <li>- Distress :4DSQ (<math>\geq 4</math>)</li> <li>- Anxiety/depression: GHQ-12 (<math>\geq 3</math>)</li> <li>- Sleep disturbance: PROMIS Sleep (<math>\geq 13</math>)</li> <li>- Adverse alcohol use: AUDIT-C (<math>\geq 5</math>)</li> </ul> | <p><b>Prevalence football;</b></p> <ul style="list-style-type: none"> <li>- Distress 14.7 (10.9–18.4)</li> <li>- Anxiety/depression 18.1 (14.1–22.2)</li> <li>- Sleep disturbance 15.8 (12.0–19.6)</li> <li>- Adverse alcohol use 2.9 (1.1–4.6)</li> </ul> <p><b>Prevalence handball;</b></p> <ul style="list-style-type: none"> <li>- Distress 19.8 (14.7–25.0)</li> <li>- Anxiety/depression 26.3 (20.6–32.0)</li> <li>- Sleep disturbance 22.0 (16.7–27.3)</li> <li>- Adverse alcohol use 2.6 (0.5–4.6)</li> </ul>                                                                                                                                                                                                                                                                                                                                                                                                                                                                                                                 |
| Schaal 2011 <sup>41</sup>   | <p><b>N</b>=2067<br/> <b>A</b>=18.5 yrs (SD=4.9)<br/> <b>G</b>=M:F 1339:728<br/> <b>Nat</b>=France<br/> <b>S</b>=Mixed Olympic sports</p>                                                                                              | Observational cross-sectional and retrospective | <p><b>Definition:</b> 4-week prevalence of symptoms of distress, anxiety/depression, sleep disturbance, eating disorders, and adverse alcohol use.</p> <p><b>Instrument(s):</b></p> <ul style="list-style-type: none"> <li>- Clinical diagnosis (physician or psychologist) according to DSM-IV criteria</li> </ul>                                                                                                                                    | <p><b>Prevalence current;</b></p> <ul style="list-style-type: none"> <li>- Generalised anxiety 6 (NR)</li> <li>- Panic disorder 1.2 (NR)</li> <li>- Agrophobia 1.0 (NR)</li> <li>- OCD 1.6 (NR)</li> <li>- Social phobia 0.8 (NR)</li> <li>- Major depression 0.7 (NR)</li> <li>- Anorexia nervosa 0.2 (NR)</li> <li>- Bulimia nervosa 0.4 (NR)</li> <li>- EDNOS 4.3 (NR)</li> <li>- Sleep problems (&gt;15 days) 21.5 (NR)</li> <li>- Psychosis 0.2 (NR)</li> <li>- Substance abuse / dependence 0</li> </ul> <p><b>Prevalence lifetime;</b></p> <ul style="list-style-type: none"> <li>- Generalised anxiety 8 (NR)</li> <li>- Panic disorder 2.8 (NR)</li> <li>- Agrophobia 1.8 (NR)</li> <li>- OCD 1.7 (NR)</li> <li>- Social phobia 1.3 (NR)</li> <li>- Major depression 2.6 (NR)</li> <li>- Anorexia nervosa 1.1 (NR)</li> <li>- Bulimia nervosa 1.4 (NR)</li> <li>- EDNOS 6.2 (NR)</li> <li>- Sleep problems (&gt;15 days) 26.6 (NR)</li> <li>- Psychosis 0.4 (NR)</li> <li>- Substance abuse / dependence 4.1 (NR)</li> </ul> |
| Schuring 2017 <sup>14</sup> | <p><b>N</b>=78 (baseline), 53 (6-month follow-up)<br/> <b>A</b>= 27 yrs (SD=5)</p>                                                                                                                                                     | Observational prospective cohort                | <p><b>Definition:</b> 4-week prevalence, and 6-month incidence of symptoms of distress,</p>                                                                                                                                                                                                                                                                                                                                                            | <p><b>Prevalence;</b></p> <ul style="list-style-type: none"> <li>- Distress 38.4 (28.0–49.8)</li> <li>- Anxiety/depression 37.0 (26.8–49.1)</li> </ul>                                                                                                                                                                                                                                                                                                                                                                                                                                                                                                                                                                                                                                                                                                                                                                                                                                                                                |

|                        |                                                                                                                                     |                               |                                                                                                                                                                                                                                                                              |                                                                                                                                                                                                                                                                      |
|------------------------|-------------------------------------------------------------------------------------------------------------------------------------|-------------------------------|------------------------------------------------------------------------------------------------------------------------------------------------------------------------------------------------------------------------------------------------------------------------------|----------------------------------------------------------------------------------------------------------------------------------------------------------------------------------------------------------------------------------------------------------------------|
|                        | <b>G</b> =M:F 68:10<br><b>Nat</b> =South Africa<br><b>S</b> =Cricket                                                                |                               | anxiety/depression, sleep disturbance, and adverse alcohol use.<br><br><b>Instrument(s):</b><br>- Distress :4DSQ ( $\geq 4$ )<br>- Anxiety/depression: GHQ-12 ( $\geq 3$ )<br>- Sleep disturbance: PROMIS Sleep ( $\geq 13$ )<br>- Adverse alcohol use: AUDIT-C ( $\geq 5$ ) | - Sleep disturbance 38.4 (28.0–49.8)<br>- Adverse alcohol use 26.0 (17.3–37.2)<br><br><b>6-month incidence;</b><br>- Distress 9.4 (2.5–25.0)<br>- Anxiety/depression 15.6 (6.4–32.2)<br>- Sleep disturbance 15.2 (6.2–31.4)<br>- Adverse alcohol use 15.6 (6.4–32.2) |
| Tan 2016 <sup>43</sup> | <b>N</b> =51<br><b>A</b> = 16.70 yrs (2.46)<br><b>G</b> =M:F 16:35<br><b>Nat</b> = England, Scotland, Wales<br><b>S</b> =Gymnastics | Observational cross-sectional | <b>Definition:</b> Identify symptom patterns of eating disorder and depression.<br><br><b>Instrument(s):</b><br>Depression: BDI-II (10-18, $\geq 19$ )<br>Eating problem: EAT-26 (20)                                                                                        | <b>Prevalence current;</b><br>Depression, mild 40 (NR)<br>Depression, moderate 6 (NR)<br>Eating problem 19 (NR)                                                                                                                                                      |

*N, number of participants; A, mean age in years; G, gender; Nat, nationality; S, sport discipline(s); yrs, years; %, percentage; CI, Confidence interval; SD, Standard deviation; NR, Not reported; EDNOS, Eating disorders not otherwise specified; \*one participant did not specify gender*

**TABLE 2 Occurrence of (symptoms of) mental health disorders among former elite athletes: data extraction from included studies.**

| Article information               | Study population                                                                                                                                                                                                      | Study design                     | Outcome measures (caseness cut-off)                                                                                                                                                                                                                                                                 | Prevalence/incidence % (95% CI)                                                                                                                                                                                                                                                                                                                 |
|-----------------------------------|-----------------------------------------------------------------------------------------------------------------------------------------------------------------------------------------------------------------------|----------------------------------|-----------------------------------------------------------------------------------------------------------------------------------------------------------------------------------------------------------------------------------------------------------------------------------------------------|-------------------------------------------------------------------------------------------------------------------------------------------------------------------------------------------------------------------------------------------------------------------------------------------------------------------------------------------------|
| Brown 2017 <sup>16</sup>          | <b>N</b> = 173 (voluntary retirement), 120 (forced retirement)<br><b>A</b> =39 yrs (SD=5) voluntary, 37 yrs (SD= 5) forced<br><b>G</b> = M:F 293:0<br><b>Nat</b> =France, Ireland and South Africa<br><b>S</b> =Rugby | Observational prospective cohort | <b>Definition:</b> Prevalence of symptoms of distress, anxiety/depression, sleep disturbance, and adverse alcohol use.<br><br><b>Instrument(s):</b><br>- Distress :4DSQ (≥4)<br>- Anxiety/depression: GHQ-12 (≥3)<br>- Sleep disturbance: PROMIS Sleep (≥13)<br>- Adverse alcohol use: AUDIT-C (≥5) | <b>Prevalence voluntary retirement;</b><br>- Distress 18.9 (NR)<br>- Anxiety/depression 26.1 (NR)<br>- Sleep disturbance 23.9 (NR)<br>- Adverse alcohol use 21.9 (NR)<br><br><b>Prevalence forced retirement;</b><br>- Distress 32.8 (NR)<br>- Anxiety/depression 32.7 (NR)<br>- Sleep disturbance 34.5 (NR)<br>- Adverse alcohol use 26.3 (NR) |
| Gouttebarge 2015 <sup>22</sup>    | <b>N</b> =104<br><b>A</b> =36 yrs (SD=5)<br><b>G</b> =M:F 104:0<br><b>Nat</b> =Australia, Ireland, The Netherlands, New Zealand, Scotland and the USA<br><b>S</b> =Football (soccer)                                  | Observational cross-sectional    | <b>Definition:</b> Prevalence of symptoms of distress, anxiety/depression, and adverse alcohol use.<br><br><b>Instrument(s):</b><br>- Distress :4DSQ (≥4)<br>- Anxiety/depression: GHQ-12 (≥3)<br>- Adverse alcohol use: AUDIT-C (≥5)                                                               | <b>Prevalence;</b><br>- Distress 18 (12–27)<br>- Anxiety/depression 39 (30–49)<br>- Adverse alcohol use 32 (24–41)                                                                                                                                                                                                                              |
| Gouttebarge 2016 <sup>25,26</sup> | <b>N</b> =219<br><b>A</b> = 35.0 yrs (SD=6.4)<br><b>G</b> =M:F 219:0<br><b>Nat</b> = Belgium, Chile, Finland, France, Japan, Norway, Paraguay, Peru, Spain, Sweden Switzerland<br><b>S</b> =Football (soccer)         | Observational cross-sectional    | <b>Definition:</b> Prevalence of symptoms of distress, anxiety/depression, and adverse alcohol use.<br><br><b>Instrument(s):</b><br>- Distress :4DSQ (≥4)<br>- Anxiety/depression: GHQ-12 (≥3)<br>- Sleep disturbance: PROMIS Sleep (≥13)<br>- Adverse alcohol use: AUDIT-C (≥5)                    | <b>Prevalence;</b><br>- Distress 18.4 (13.2 - 23.7)<br>- Anxiety/depression 35.3 (28.4 - 42.1)<br>- Sleep disturbance 28.2 (22.0 - 34.3)<br>- Adverse alcohol use 24.6 (18.7 - 30.6)                                                                                                                                                            |
| Gouttebarge 2016 <sup>27</sup>    | <b>N</b> = 295<br><b>A</b> = 38 yrs (SD=6)<br><b>G</b> =M:F 295:0<br><b>Nat</b> = France, Ireland and South Africa,<br><b>S</b> = Rugby                                                                               | Observational cross-sectional    | <b>Definition:</b> Prevalence of symptoms of distress, anxiety/depression, and adverse alcohol use.<br><br><b>Instrument(s):</b><br>- Distress :4DSQ (≥4)<br>- Anxiety/depression: GHQ-12 (≥3)<br>- Sleep disturbance: PROMIS Sleep (≥13)<br>- Adverse alcohol use: AUDIT-C (≥5)                    | <b>Prevalence;</b><br>- Distress 24.8 (19.7–29.9)<br>- Anxiety/depression 28.4 (23.1–33.7)<br>- Sleep disturbance 28.8 (23.1–34.5)<br>- Adverse alcohol use 23.8 (18.8–28.9)                                                                                                                                                                    |

|                                |                                                                                                                                                                               |                                  |                                                                                                                                                                                                                                                                                                                                                                                                                                             |                                                                                                                                                                                                                                                                                                                                                                                                                                                        |
|--------------------------------|-------------------------------------------------------------------------------------------------------------------------------------------------------------------------------|----------------------------------|---------------------------------------------------------------------------------------------------------------------------------------------------------------------------------------------------------------------------------------------------------------------------------------------------------------------------------------------------------------------------------------------------------------------------------------------|--------------------------------------------------------------------------------------------------------------------------------------------------------------------------------------------------------------------------------------------------------------------------------------------------------------------------------------------------------------------------------------------------------------------------------------------------------|
| Gouttebarga 2017 <sup>30</sup> | <b>N</b> =282<br><b>A</b> = 50.7 (15.1)<br><b>G</b> =M:F 138:144<br><b>Nat</b> = Netherlands<br><b>S</b> =Mixed Olympic and national team athletes                            | Observational cross-sectional    | <b>Definition:</b> Prevalence of symptoms of distress, anxiety/depression, adverse alcohol use, and eating disorder.<br><br><b>Instrument(s):</b><br>- Distress :4DSQ ( $\geq 4$ )<br>- Anxiety/depression: GHQ-12 ( $\geq 3$ )<br>- Sleep disturbance: PROMIS Sleep ( $\geq 13$ )<br>- Adverse alcohol use: AUDIT-C ( $\geq 5$ )<br>- Eating disorders: Eating Disorder Screen - Primary Care ( $\geq 2$ )                                 | <b>Prevalence;</b><br>- Distress 17.5 (13.1–21.9)<br>- Anxiety/depression 29.4 (24.1–34.8)<br>- Sleep disturbance 21.8 (17.0–26.6)<br>- Adverse alcohol use 23.2 (18.2–28.2)<br>- Eating disorder 27.4 (22.2–32.7)                                                                                                                                                                                                                                     |
| Gouttebarga 2017 <sup>31</sup> | <b>N</b> = 123 (baseline), 77 (6-month follow-up)<br><b>A</b> =35 yrs (8)<br><b>G</b> =M:F 123:0<br><b>Nat</b> =Denmark, Finland, Norway, Switzerland<br><b>S</b> =Ice hockey | Observational prospective cohort | <b>Definition:</b> 4-week prevalence, and 6-month incidence of symptoms of distress, anxiety/depression, sleep disturbance, and adverse alcohol use.<br><br><b>Instrument(s):</b><br>- Distress :4DSQ ( $\geq 4$ )<br>- Anxiety/depression: GHQ-12 ( $\geq 3$ )<br>- Sleep disturbance: PROMIS Sleep ( $\geq 13$ )<br>- Adverse alcohol use: AUDIT-C ( $\geq 5$ )<br>- Eating disorders: Eating Disorder Screen - Primary Care ( $\geq 2$ ) | <b>4-week prevalence;</b><br>- Distress 11.7 (6.8–19.1)<br>- Anxiety/depression 19.4 (13.0–28.0)<br>- Sleep disturbance 16.7 (10.7–24.9)<br>- Adverse alcohol use 28.7 (21.0–37.9)<br>- Eating disorders 23.8 (14.9–35.7)<br><br><b>6-month incidence;</b><br>- Distress 8.3 (<0.0–37.5)<br>- Anxiety/depression 8.3 (<0.0–37.5)<br>- Sleep disturbance 25.0 (8.3–53.9)<br>- Adverse alcohol use 16.7 (3.5–46.0)<br>- Eating disorders 8.3 (<0.0–37.5) |
| Hart 2013 <sup>35</sup>        | <b>N</b> = 34<br><b>A</b> =61.8 yrs (57.8–65.7)<br><b>G</b> =M:F 34:0<br><b>Nat</b> =USA<br><b>S</b> =American Football                                                       | Observational cross-sectional    | <b>Definition:</b> Diagnoses of depression, dementia, Alzheimer disease and mild cognitive impairment<br><br><b>Instrument(s):</b><br>- Depression: BDI-II (NR)<br>- Dementia: DSM-IV (NR)<br>- Alzheimer Disease (NR)<br>- Mild Cognitive Impairment (NR)                                                                                                                                                                                  | <b>Prevalence;</b><br>- Depression: 24 (NR)<br>- Dementia: 6 (NR)<br>- Alzheimer Disease: 12 (NR)<br>- Mild Cognitive Impairment: 23 (NR)                                                                                                                                                                                                                                                                                                              |
| Kerr 2012 <sup>38</sup>        | <b>N</b> = 2536 (2001), 1316 (2010)<br><b>A</b> =NR<br><b>G</b> =M:F 2536:0<br><b>Nat</b> = USA<br><b>S</b> = American football                                               | Observational prospective cohort | <b>Definition:</b> Prevalence and 9-year incidence of clinical diagnosis of depression<br><br><b>Instrument(s):</b><br>- Depression: GHS questions                                                                                                                                                                                                                                                                                          | <b>2010 prevalence;</b><br>- Depression 42.0 (39.7–44.3)<br><br><b>9-year incidence;</b><br>- Depression –4.4 (–7.1 to –1.7)                                                                                                                                                                                                                                                                                                                           |
| Kilic 2017 <sup>39</sup>       | <b>N</b> =345 football, 230 handball<br><b>A</b> =34.0 yrs (SD=4.9) football, 35.0 yrs (SD=5.6) handball<br><b>G</b> =M:F 79:21 football, 100:0 handball                      | Observational cross-sectional    | <b>Definition:</b> 4-week prevalence of symptoms of distress, anxiety/depression, sleep disturbance, eating disorders, and adverse alcohol use.                                                                                                                                                                                                                                                                                             | <b>Prevalence football;</b><br>- Distress 8.7 (5.2–12.1)<br>- Anxiety/depression 18.7 (13.8–23.5)<br>- Sleep disturbance 11.0 (7.2–14.9)<br>- Adverse alcohol use 8.4 (4.9–11.8)                                                                                                                                                                                                                                                                       |



|                               |                                                                                                                                                                                          |                                  |                                                                                                                                                                                                                                                                                                                                                               |                                                                                                                                                                                                                                                                                                                                                           |
|-------------------------------|------------------------------------------------------------------------------------------------------------------------------------------------------------------------------------------|----------------------------------|---------------------------------------------------------------------------------------------------------------------------------------------------------------------------------------------------------------------------------------------------------------------------------------------------------------------------------------------------------------|-----------------------------------------------------------------------------------------------------------------------------------------------------------------------------------------------------------------------------------------------------------------------------------------------------------------------------------------------------------|
|                               | <b>Nat</b> =Denmark<br><b>S</b> =Football (soccer), handball                                                                                                                             |                                  | <b>Instrument(s):</b><br>- Distress :4DSQ ( $\geq 4$ )<br>- Anxiety/depression: GHQ-12 ( $\geq 3$ )<br>- Sleep disturbance: PROMIS Sleep ( $\geq 13$ )<br>- Adverse alcohol use: AUDIT-C ( $\geq 5$ )                                                                                                                                                         | <b>Prevalence handball;</b><br>- Distress 16.3 (10.8–21.8)<br>- Anxiety/depression 15.8 (10.3–21.3)<br>- Sleep disturbance 12.2 (7.3–17.1)<br>- Adverse alcohol use 7.0 (3.2–10.9)                                                                                                                                                                        |
| Sanders 2017 <sup>40</sup>    | <b>N</b> = 307<br><b>A</b> = 46.8 (SD=15.7)<br><b>G</b> =M:F 307:0<br><b>Nat</b> = UK<br><b>S</b> = Football (soccer)                                                                    | Observational cross-sectional    | <b>Definition:</b> Prevalence of possible clinically relevant depressive symptoms<br><b>Instrument(s):</b><br>- Depression: SDHS ( $< 10$ )                                                                                                                                                                                                                   | <b>7-day prevalence;</b><br>- Depression 15.6 (NR)                                                                                                                                                                                                                                                                                                        |
| Schuring 2017 <sup>14</sup>   | <b>N</b> =38 (baseline), 23 (6-month follow-up)<br><b>A</b> = 36 yrs (SD=6)<br><b>G</b> =M:F 38:0<br><b>Nat</b> =South Africa<br><b>S</b> =Cricket                                       | Observational prospective cohort | <b>Definition:</b> 4-week prevalence, and 6-month incidence of symptoms of distress, anxiety/depression, sleep disturbance, and adverse alcohol use.<br><b>Instrument(s):</b><br>- Distress :4DSQ ( $\geq 4$ )<br>- Anxiety/depression: GHQ-12 ( $\geq 3$ )<br>- Sleep disturbance: PROMIS Sleep ( $\geq 13$ )<br>- Adverse alcohol use: AUDIT-C ( $\geq 5$ ) | <b>Prevalence;</b><br>- Distress 26.3 (14.8–42.2)<br>- Anxiety/depression 24.3 (13.2–40.3)<br>- Sleep disturbance 21.1 (10.8–36.6)<br>- Adverse alcohol use 22.2 (11.5–38.3)<br><b>6-month incidence;</b><br>- Distress 0.0 (0.0–0.0)<br>- Anxiety/depression 0.0 (0.0–0.0)<br>- Sleep disturbance 5.6 (0.0–27.7)<br>- Adverse alcohol use 5.6 (0.0–27.7) |
| Schwenk 2007 <sup>42</sup>    | <b>N</b> = 1617<br><b>A</b> = 53.4 (SD=14.5)<br><b>G</b> =M:F 1617:0<br><b>Nat</b> = USA<br><b>S</b> = American Football                                                                 | Observational cross-sectional    | <b>Definition:</b> Prevalence of depression<br><b>Instrument(s):</b><br>- Depression: PHQ-9 ( $\geq 10$ )                                                                                                                                                                                                                                                     | <b>Prevalence;</b><br>- Depression 14.7 (NR)                                                                                                                                                                                                                                                                                                              |
| Van Ramele 2017 <sup>44</sup> | <b>N</b> = 212 (baseline), 194 (12-month follow-up)<br><b>A</b> =35 yrs (8)<br><b>G</b> =M:F 212:0<br><b>Nat</b> = Finland, France, Norway, Spain, Sweden<br><b>S</b> =Football (soccer) | Observational prospective cohort | <b>Definition:</b> 12-month incidence of symptoms of distress, anxiety/depression, sleep disturbance, and adverse alcohol use.<br><b>Instrument(s):</b><br>- Distress :4DSQ ( $\geq 4$ )<br>- Anxiety/depression: GHQ-12 ( $\geq 3$ )<br>- Sleep disturbance: PROMIS Sleep ( $\geq 13$ )<br>- Adverse alcohol use: AUDIT-C ( $\geq 5$ )                       | <b>12-month incidence;</b><br>- Distress 11 (6-17)<br>- Anxiety/depression 29 (21-39)<br>- Sleep 28 (20-38)<br>- Adverse alcohol use 15 (9-23)                                                                                                                                                                                                            |
| Willer 2018 <sup>45</sup>     | <b>N</b> = 21<br><b>A</b> = 56.7 (SD = 9.5)<br><b>G</b> = M:F 21:0<br><b>Nat</b> = USA<br><b>S</b> = American football and ice hockey                                                    | Observational cross-sectional    | <b>Definition:</b> Clinical diagnosis of depression, anxiety<br><b>Instrument(s):</b><br>- Depression: BDI-I ( $\geq 14$ )<br>- Anxiety: BAI ( $\geq 10$ )                                                                                                                                                                                                    | <b>Prevalence;</b><br>- Depression 23.8 (NR)<br>- Anxiety 33.3 (NR)                                                                                                                                                                                                                                                                                       |

1  
2  
3 *N, number of participants; A, mean age in years; G, gender; Nat, nationality; S, sport discipline(s); yrs, years; %, percentage; CI, Confidence interval; SD,*  
4 *Standard deviation; NR, Not reported; EDNOS, Eating disorders not otherwise specified*  
5  
6  
7  
8  
9  
10  
11  
12  
13  
14  
15  
16  
17  
18  
19  
20  
21  
22  
23  
24  
25  
26  
27  
28  
29  
30  
31  
32  
33  
34  
35  
36  
37  
38  
39  
40  
41  
42  
43  
44  
45  
46

Confidential: For Review Only
